# Supplementary material for: Catalytic synthesis, characterization and magnetic properties of iron phosphide nanowires
Source: Royal Society of Chemistry journal article supplement (doi:10.1039/b311943b), 2004-01-01

## S-4. Sample D (Fe)

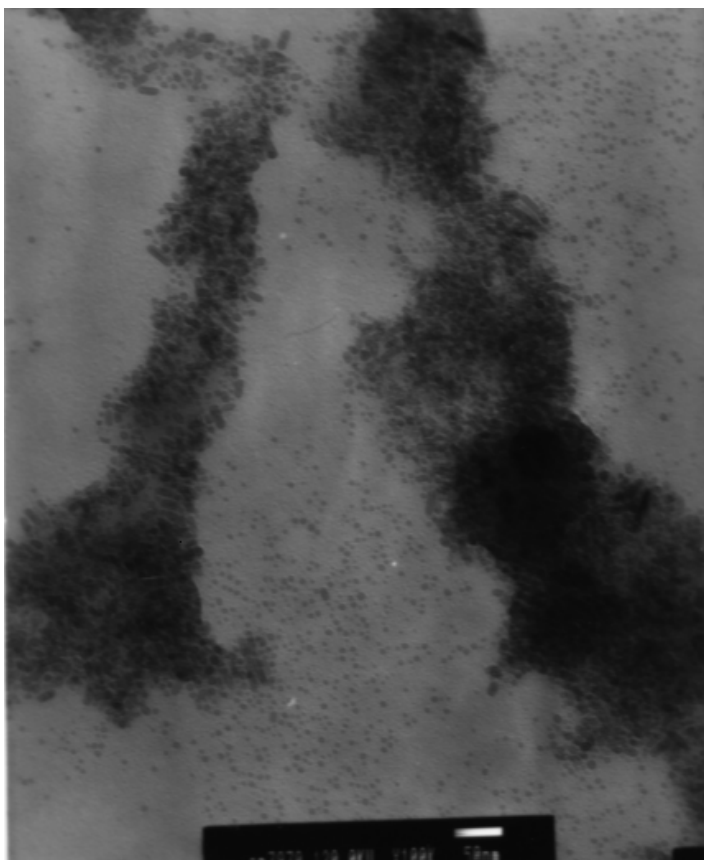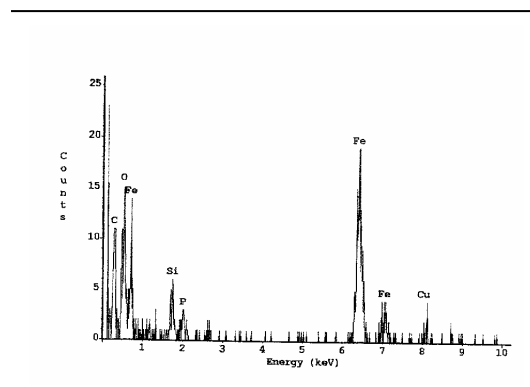

FC and FC magnetization vs. temperature at applied magnetic field of 1000 Oe

$T_B = 58 \text{ K}$  and  $T_{irr} = 116 \text{ K}$

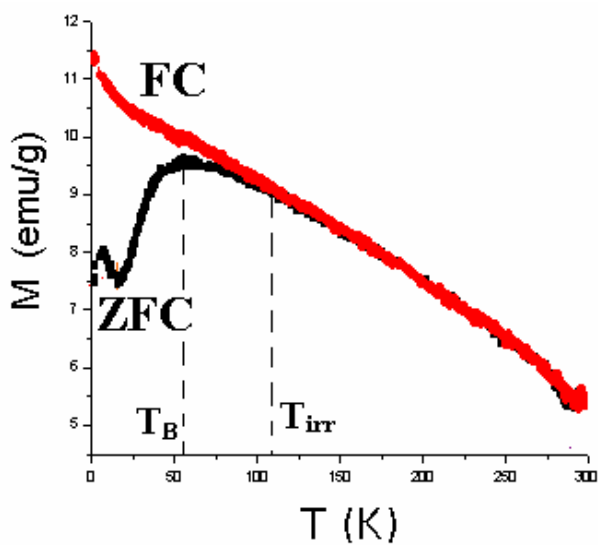

magnetization hysteresis loop recorded at 2 K

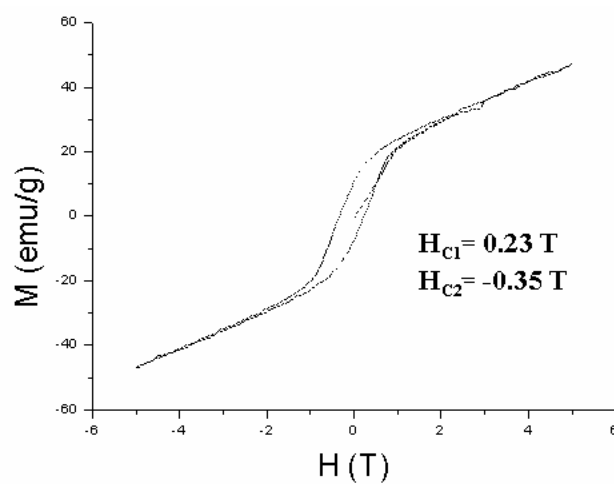

Supplement: figs4.pdf [file figs4.pdf]
